# Supplementary material for: The Structure of an LIM-Only Protein 4 (LMO4) and Deformed Epidermal Autoregulatory Factor-1 (DEAF1) Complex Reveals a Common Mode of Binding to LMO4
Source: PubMed Central journal article supplement (PMC4195752; doi:10.1371/journal.pone.0109108), 2014-10-13
Supplement: pone.0109108.s002.pdf [file pone.0109108.s002.pdf]

## Supplementary Information S2

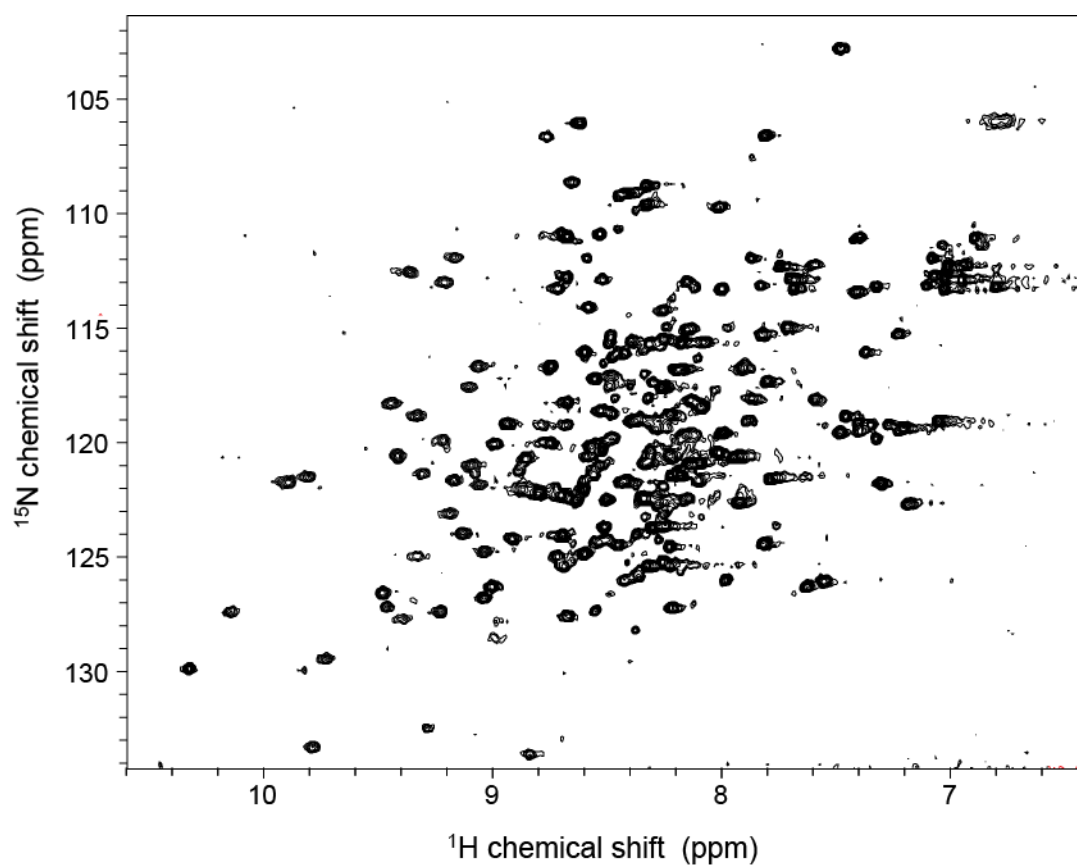

**Fig S1.**  $^{15}\text{N}$ -HSQC spectrum of LMO4<sub>16-148</sub>•L4-DEAF1. The protein (115  $\mu\text{M}$ ) was in 20 mM sodium acetate, 35 mM NaCl, 1 mM DTT (dithiothreitol) at pH 5.0. Spectra were recorded on a 600 MHz spectrometer at 310 K.



The LMO4<sub>LIM1+2</sub>•L4-DEAF1 samples contained 1 mM DTT. The LMO4<sub>LIM2</sub>•DEAF1<sub>404-418</sub> sample also contained TCEP (tris(2-carboxyethyl)phosphine-HCl; 0.5 mM), chloramphenicol 34  $\mu\text{g}/\text{mL}^{-1}$  and Complete EDTA-free protease (Roche;  $\sim 0.5$  mM). Spectra were recorded on a 600 MHz spectrometer at 298 K. The top and bottom panels are identical except that the bottom panel includes labels showing peak assignments for LMO4<sub>LIM2</sub>•DEAF1<sub>404-418</sub> [1] (BMRB: **18898**). Labels for S208 from the linker and DEAF1 are in orange. The peaks marked with an asterisks (\*) were aliased for LMO4<sub>LIM2</sub>•DEAF1<sub>404-418</sub> and the likely corresponding peaks in LMO4<sub>LIM1+2</sub>•L4-DEAF1 are indicated (grey lines and labels).

There is substantial overlap of the spectrum of the smaller complex with that of the larger complex. Although the peaks for LMO4<sub>LIM1+2</sub>•L4-DEAF1 have not been assigned, by inference peaks corresponding to residues from S208 and DEAF1<sub>404-411</sub>, and most residues in the LMO4<sub>LIM2</sub> domain from LMO4<sub>LIM2</sub>•DEAF1<sub>404-418</sub> are recapitulated in the spectrum of the larger construct. Peaks corresponding to DEAF1<sub>412-418</sub> are either in crowded regions (making them impossible to distinguish) or appear to have shifted.

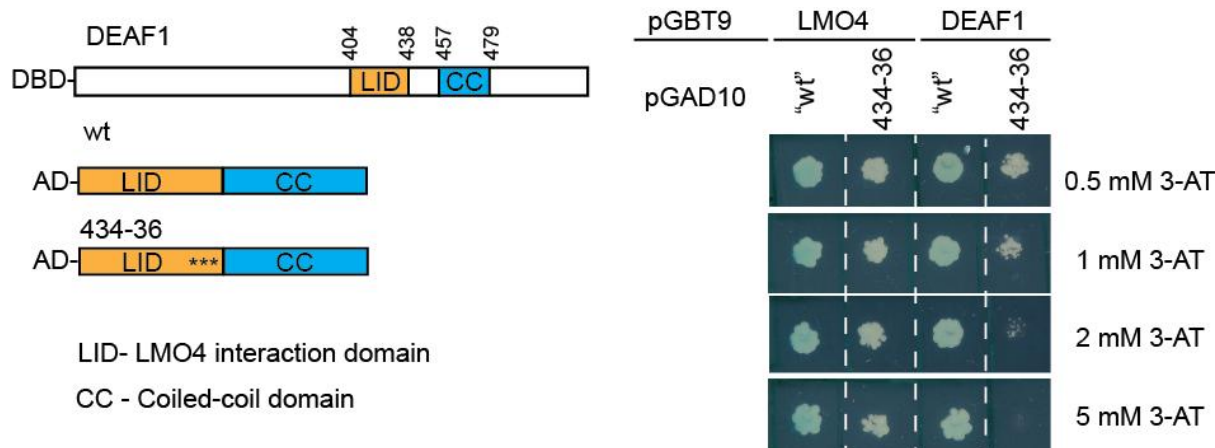

**Fig S3. The 434–36 triple alanine mutant of DEAF1 is destabilised in yeast compared to wild-type.** Yeast-two hybrid assays were used to compare the interaction of wt and mutant pGAD10-DEAF1<sub>404–438\_457–479</sub> with pGBT9-LMO4 and pGBT9-DEAF1<sub>45–566</sub>, via the LMO4 interaction domain and coiled-coil domain of DEAF1, respectively. The 434–36 triple alanine mutant construct shows significant loss of self interaction through the coiled-coil domain under selection conditions that allow interaction with LMO4 (-L-W-H plus 0.5–5 mM 3-AT), suggesting that the mutant construct is destabilised and/or degraded compared to the wild-type (“wt”). Note that self interaction of DEAF1 via the coiled-coil domain was reported previously [2], and no growth of the mutant with LMO4 is seen under high stringency selection conditions (-L-W-A; Fig 1c).

## References

- [1] Joseph, S., Kwan, A. Y., Mackay, J., Cubeddu, L. & Matthews, J. M. (2014). Backbone and side-chain assignments of a tethered complex between LMO4 and DEAF-1. *Biomol NMR Assign* **8**, 141-4.
- [2] Cubeddu L, Joseph S, Richard DJ, Matthews JM (2012) Contribution of DEAF1 structural domains to the interaction with the breast cancer oncogene LMO4. *PLoS ONE* **7**: e39218.
